# Supplementary material for: Co-Expression with Membrane CMTM6/4 on Tumor Epithelium Enhances the Prediction Value of PD-L1 on Anti-PD-1/L1 Therapeutic Efficacy in Gastric Adenocarcinoma
Source: MDPI journal article supplement (doi:10.3390/cancers13205175), 2021-10-15
Supplement: s1 [file s1]

Table S1. One-way ANOVA analysis of 8 features in tumor epithelial cells in the 48-case with immunotherapy.

| Feature      | CMTM6 | CMTM4 | PD-L1 | PD-1  | 6 <sup>+</sup> PD-L1 <sup>+</sup> | 4 <sup>+</sup> PD-L1 <sup>+</sup> | 4 <sup>+</sup> 6 <sup>+</sup> | 6 <sup>+</sup> 4 <sup>+</sup><br>*PD-L1 <sup>+</sup> |
|--------------|-------|-------|-------|-------|-----------------------------------|-----------------------------------|-------------------------------|------------------------------------------------------|
| significance | 0.155 | 0.02  | 0.54  | 0.248 | 0.185                             | 0.159                             | 0.058                         | 0.162                                                |

Table S2 Baseline Characteristics of the 48 GC patients receiving immunotherapy

|                                           | Total(N=48) | CMTM6            |                 | <i>p</i> |
|-------------------------------------------|-------------|------------------|-----------------|----------|
|                                           |             | Higher(>Median*) | Lower(<Median*) |          |
| Age (yr)                                  | 61 (24-81)  |                  |                 | 0.56     |
| >=60                                      | 28          | 15               | 13              |          |
| <60                                       | 20          | 9                | 11              |          |
| Sex                                       |             |                  |                 | 0.75     |
| Female                                    | 13          | 7                | 6               |          |
| Male                                      | 35          | 17               | 18              |          |
| ECOG status                               |             |                  |                 | 0.35     |
| 0                                         | 20          | 12               | 8               |          |
| 1                                         | 24          | 11               | 13              |          |
| 2                                         | 4           | 1                | 3               |          |
| Previous gastrectomy                      |             |                  |                 | 0.087    |
| Yes                                       | 21          | 8                | 13              |          |
| No                                        | 27          | 17               | 10              |          |
| Treatment naive                           | 3           |                  |                 |          |
| Number of previous<br>therapy(palliation) |             |                  |                 | 0.5      |
| 1                                         | 18          | 8                | 10              |          |

|                    |               |    |    |       |
|--------------------|---------------|----|----|-------|
| 2                  | 15            | 9  | 5  |       |
| >2                 | 12            | 7  | 5  |       |
| Primary tumor site |               |    |    | 0.26  |
| Cardia/Fundus/EGJ  | 21            | 10 | 11 |       |
| Body               | 11            | 8  | 3  |       |
| Antrum             | 14            | 7  | 7  |       |
| GSC**              | 2             | 0  | 2  |       |
| Metastatic sites   |               |    |    | 0.046 |
| 1                  | 12            | 3  | 9  |       |
| >=2                | 36            | 21 | 15 |       |
| EBV positivity     | 18.6% (8/43)  |    |    | 0.14  |
| EBER+              | 8             | 6  | 2  |       |
| EBER-              | 35            | 16 | 19 |       |
| HER2 positivity    | 48.9% (23/47) |    |    | 0.46  |
| +                  | 23            | 13 | 10 |       |
| - (FISH-/IHC-)     | 24            | 11 | 13 |       |
| pMMR               | 76.1% (35/46) | 18 | 17 | 0.73  |
| dMMR               | 23.9% (11/46) | 5  | 6  |       |

\*, Median level, 14.8%. \*\*, GSC, gastric stump carcinoma. Treatment naïve, first diagnose without chemo or surgery

Table S3 Efficacy outcomes in evaluable 48-case patients

|                                                 | Total(N=48)      |
|-------------------------------------------------|------------------|
| Best overall response                           |                  |
| Complete response                               | 0                |
| Partial response                                | 15               |
| Stable disease                                  | 12               |
| Progressive disease                             | 21               |
| Time to response (weeks)                        | 8 (6-36)         |
| Duration of response (weeks)                    | 34 (8-78)        |
| Median progression-free survival (95%CI; weeks) | 15.0 (8.8-21.2)  |
| Median overall survival (95%CI; weeks)          | 50.1 (33.9-66.3) |

Table S4. Expression patterns of CMTMs and PD-L1 in the gastric cancer tissues

| MSI Expression pattern                                                    | Tumor epithelial membrane                                                          | mesenchymal                                                                                        | Patients                                                                                                                                                              | Short-term efficacy of ICB                                                                   |
|---------------------------------------------------------------------------|------------------------------------------------------------------------------------|----------------------------------------------------------------------------------------------------|-----------------------------------------------------------------------------------------------------------------------------------------------------------------------|----------------------------------------------------------------------------------------------|
| Pattern 1<br>Tumor<br>CMTM6/4+PD-L1+                                      | <b>1A:</b> CMTM6+CMTM4+PD-L1+                                                      |                                                                                                    | <b>PR149082</b> , PR8554, PR131788,                                                                                                                                   | <b>PR(9/12) 75%</b><br><br>SD(2/12) 16.66%<br>PD(1/12) 8.33%<br><b>Non-PD (11/12) 91.66%</b> |
|                                                                           | <b>1B:</b> CMTM6+CMTM4+PD-L1+                                                      |                                                                                                    | PR8, <b>PR133821</b> , PR8596                                                                                                                                         |                                                                                              |
|                                                                           | <b>1C:</b> CMTM6+CMTM4+PD-L1+                                                      |                                                                                                    | <b>PD135678</b> ,PRG180182, SD131611, SD8690,<br>PR123827, PR8649,                                                                                                    |                                                                                              |
| Pattern 2<br>Mesenchymal<br>CMTM6/4+PD-L1+<br>OR Tumor<br>CMTM4+6+ PD-L1- |                                                                                    | <b>2A:</b> CMTM6-CMTM4+PD-L1+or<br>CMTM6+CMTM4+PD-L1+                                              | PR171761, PR128210, <b>SD166938</b> , SD185346,<br>PD8580,PD1,PD4, PD7562, PD8498,PD184356,                                                                           | PR(3/18) 16.67%<br>SD(7/18) 38.89%<br>PD(8/18) 44.44%                                        |
|                                                                           | <b>2B:</b> CMTM6 <sup>+/lo</sup> CMTM4 <sup>+/lo</sup> PD-L1-                      |                                                                                                    | PR14,PD8641, PD8626, SD13, <b>SD5</b> , SD6, SD9,<br>SD16,                                                                                                            |                                                                                              |
| Pattern 3<br>Single positive                                              | <b>3A:</b><br>CMTM6 <sup>+</sup><br>or CMTM4 <sup>+</sup><br>or PD-L1 <sup>+</sup> | <b>3A:</b> with or without<br>CMTM6 <sup>+</sup><br>or CMTM4 <sup>+</sup><br>or PD-L1 <sup>+</sup> | PRG137485, PR86710, PRG110489, <b>SD489641</b> ,<br>SD12 , SD167456, <b>PD8632</b> , PD8698, PD3 ,<br>PD1174, PD8510, PD7, PD15, PD8687, PD787,<br>PD2, PD881, PD8634 | PR(3/18) 16.67%<br>SD(3/18) 16.67%<br>PD(12/18) 66.67%<br><b>Non-PR (15/18) 83.33%</b>       |
